# Supplementary material
Source: publisher figshare collection journal article supplement (https://springernature.figshare.com/ndownloader/files/23947996)
Supplement: Supplementary file 1 [file 23947996]

**Isotopic composition of lead white pigments on qeros: Implications for the chronology and production of Andean ritual drinking vessels during the colonial era**

Allison N. Curley<sup>1\*†</sup>, Alyson M. Thibodeau<sup>1‡</sup>, Emily C. Kaplan<sup>2</sup>, Ellen Howe<sup>3</sup>, Ellen Pearlstein<sup>4</sup>, Judith Levinson<sup>5</sup>

<sup>1</sup>Department of Earth Sciences, Dickinson College, P.O. Box 1773, Carlisle, PA, 17013, USA

<sup>2</sup>Smithsonian National Museum of the American Indian, 4220 Silver Hill Road, Suitland, Maryland 20746, USA

<sup>3</sup>Metropolitan Museum of Art, 1000 Fifth Avenue, NY, NY 10028, USA

<sup>4</sup>UCLA Information Studies and UCLA/Getty Program in Conservation of Archaeological and Ethnographic Materials, A410 Fowler, Los Angeles, California 90065, USA

<sup>5</sup>American Museum of Natural History, 200 Central Park West, NY, NY 10024, USA

\*Present address: Department of Earth and Environmental Sciences, University of Michigan, 1100 North University Avenue, Ann Arbor, MI, 48109, USA

†corresponding author: [ancurley@umich.edu](mailto:ancurley@umich.edu)

‡ corresponding author: [thibodea@dickinson.edu](mailto:thibodea@dickinson.edu)

Additional File 1: Use of white pigments on *barniz de Pasto* objects

## Use of white pigments on *barniz de Pasto* objects

Lead white and mopa mopa resin were also used in a related colonial art form known as *barniz de Pasto*, produced in Pasto, Columbia and Quito, Ecuador for the Spanish market. Often referred to as a lacquer technique, local artisans called *barnizadores* fabricated a variety of elaborately decorated secular and religious wooden objects such as writing cabinets, portable writing desks, chests, coffers, picture frames, trays, bowls, plates, and cups [1–5]. Unlike qeros, designs were based on European and Asian sources with some local influences [3–5]. This tradition began under Spanish influence very early in the colonial period, but historical records indicate that the resin was being utilized for various purposes when the Spaniards arrived, and there is a possibility that the resin’s unusual properties had been discovered centuries earlier. A thriving local craft industry called *barniz de Pasto* continues in Pasto [2,6–8]. The lustrous lacquer-like nature of these objects elicited the interest of visiting Europeans, including Alexander von Humboldt in 1801 [9], who described the resin technique and the colorants, mostly dyes from plant sources: dilute indigo for blue; pure indigo for black; annatto for red; powdered *Escobedia scabrifolia*, a saffron-like root, over silver leaf for gold; and “lead oxide” for white. Recently several investigators [10,11] have identified a previously undocumented and unusual mercury-based white colorant called calomel or mercury white ( $\text{Hg}_2\text{Cl}_2$ ) on *barniz de Pasto* objects. Calomel has also recently been identified on a 15th-century English illuminated manuscript and a late 16th-century English portrait miniature [12]. Notably, extensive studies of qero pigments indicate that calomel was not used for qero decoration [13,14].

## References

1. de Friedemann NS. Mopa mopa o barniz de Pasto: los marcos de la iglesia bogotana de Egipto. Lecciones Barrocas: Pinturas sobre la vida de la Virgen de la Ermita de Egipto. Bogotá: Museo de Arte Religioso, Banco de la República; 1990. p. 40–53.

2. Rappaport J, Cummins TBF. *Beyond the Lettered City: Indigenous Literacies in the Andes*. Durham: Duke University Press; 2012.
3. Codding MA. The decorative arts in Latin America 1492–1820. In: Rishel JJ, Stratton-Pruitt S, editors. *The arts in Latin America 1494–1820*. Philadelphia: Yale University Press; 2006. p. 98–113.
4. Codding MA. The Lacquer Arts of Latin America. In: *Made in the Americas - The New World Discovers Asia*. Boston: Museum of Fine Arts, Boston; 2015. p. 75–82.
5. Katz M. Colonial Spanish American Lacquered Objects in the Collection at the Hispanic Society of America. In: *Wooden Artifact Group Postprints: Presentations from the 2016 AIC Annual Meeting in Montréal, Canada*. Montreal, Quebec, Canada: AIC; 2016. p. 37–47.
6. Stuckart JM. *Barniz de Pasto: the impact of tourism on a traditional craft [Ph.D. diss]*. [Pittsburgh, PA]: University of Pittsburgh; 1982.
7. Botina JRP. *El barniz o mopa-mopa, Elaegia pastoensis Mora (Rubiaceae): estado actual de su conocimiento en Colombia*. Mocoa, Colombia: Corporación Autónoma Regional del Putomayo; 1990.
8. Newman R, Kaplan E, Derrick M. Mopa mopa: scientific analysis and history of an unusual South American resin used by the Inka and artisans in Pasto, Colombia. *Journal of the American Institute for Conservation*. 2015;54:123–48.
- 9 Humboldt, A von. *The route of Humboldt: Colombia and Venezuela : selected texts of Alexander von Humboldt*. Villegas Jiménez B, editor. Bogota: Villegas Editores; 1994.
10. Álvarez-White MC. El Barniz de Pasto: Reflejo de la Naturaleza. In: Maurizio P, Avegno MC, editors. *Paisaje y Naturaleza*. La Paz, Bolivia: Editorial del Estado; 2019. p. 339–46.
11. Burgio L, Melchar D, Strekopytov S, Peggie DA, Melchiorre Di Crescenzo M, Keneghan B, et al. Identification, characterisation and mapping of calomel as ‘mercury white’, a previously undocumented pigment from South America, and its use on a barniz de Pasto cabinet at the Victoria and Albert Museum. *Microchemical Journal*. 2018;143:220–7.
12. Crippa M, Legnaioli S, Kimbriel C, Ricciardi P. New evidence for the intentional use of calomel as a white pigment. *Journal of Raman Spectroscopy*. 2020; doi:10.1002/jrs.5876
13. Newman R, Kaplan E, Derrick M. Mopa Mopa: Scientific Analysis and History of an Unusual South American Resin Used by the Inka and Artisans in Pasto, Colombia. *Journal of the American Institute for Conservation*. 2015;54:123–48.
14. Howe E, Kaplan E, Newman R, Frantz JH, Pearlstein E, Levinson J, et al. The occurrence of a titanium dioxide/silica white pigment on wooden Andean qeros: a cultural and chronological marker. *Heritage Science*. 2018;6.
